# Supplementary material for: Quantitative real-time imaging of intracellular FRET biosensor dynamics using rapid multi-beam confocal FLIM
Source: PubMed Central journal article supplement (PMC7083966; doi:10.1038/s41598-020-61478-1), 2020-03-20
Supplement: 41598_2020_61478_MOESM1_ESM.pdf [file 41598_2020_61478_MOESM1_ESM.pdf]

## **Quantitative real-time imaging of intracellular FRET biosensor dynamics using rapid multi-beam confocal FLIM**

James A. Levitt<sup>1,2</sup>, Simon P. Poland<sup>2</sup>, Nikola Krstajic<sup>3</sup>, Karin Pfisterer<sup>4</sup>, Ahmet Erdogan<sup>5</sup>, Paul R. Barber<sup>6</sup>, Maddy Parsons<sup>4</sup>, Robert K. Henderson<sup>5</sup> and Simon M. Ameer-Beg<sup>2\*</sup>

<sup>1</sup>Microscopy Innovation Centre, Guy's Campus, Kings College, London, SE1 1UL, UK.

<sup>2</sup>Richard Dumbleby Laboratories, School of Cancer and Pharmaceutical Sciences, Guy's Campus, Kings College London, London, SE1 1UL, UK.

<sup>3</sup> School of Science and Engineering, Fulton Building, University of Dundee, DD1 4HN, UK.

<sup>4</sup>Randall Centre for Cell and Molecular Biophysics, Guy's Campus, Kings College, London, SE1 1UL, UK.

<sup>5</sup>Institute for Microelectronics and Nanosystems, School of Engineering, College of Science and Engineering, University of Edinburgh, EH9 3FF, UK.

<sup>6</sup>UCL Cancer Institute, Paul O'Gorman Building, University College London, London, WC1E 6DD, UK.

\*Corresponding author. Email: [simon.ameer-beg@kcl.ac.uk](mailto:simon.ameer-beg@kcl.ac.uk)

**Supplementary Information**

## Supplementary figures

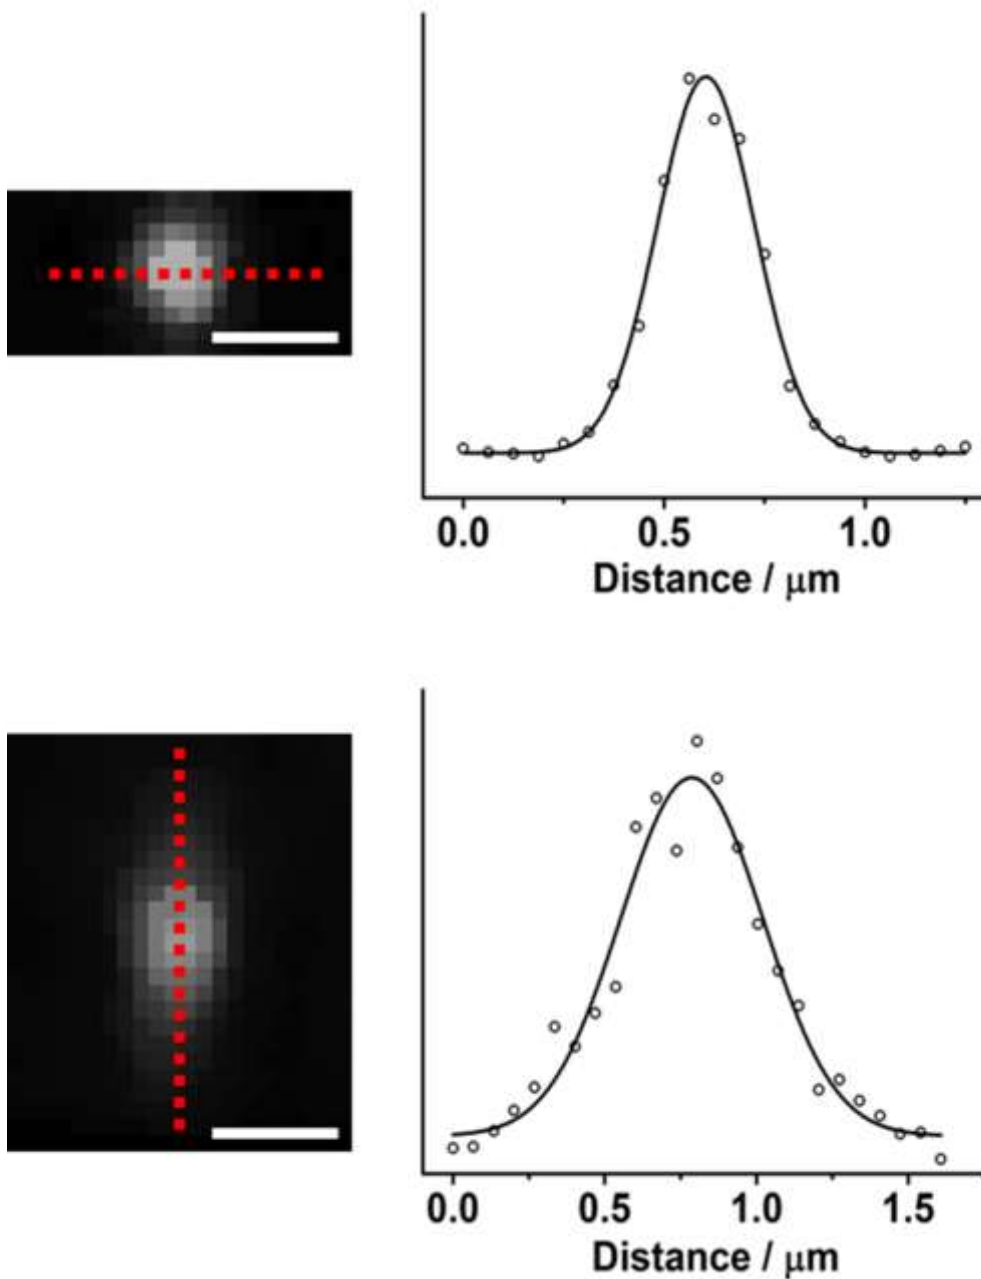

**Supplementary figure 1:** (a) Representative lateral (upper panel) and axial (lower panel) confocal measurements of  $0.2\ \mu\text{m}$  microspheres with excitation at  $435\ \text{nm}$

and emission at 485 nm with Gaussian fits (black solid lines) to data points (open circles) from line profiles of the images. Scale bar 0.5  $\mu\text{m}$ .

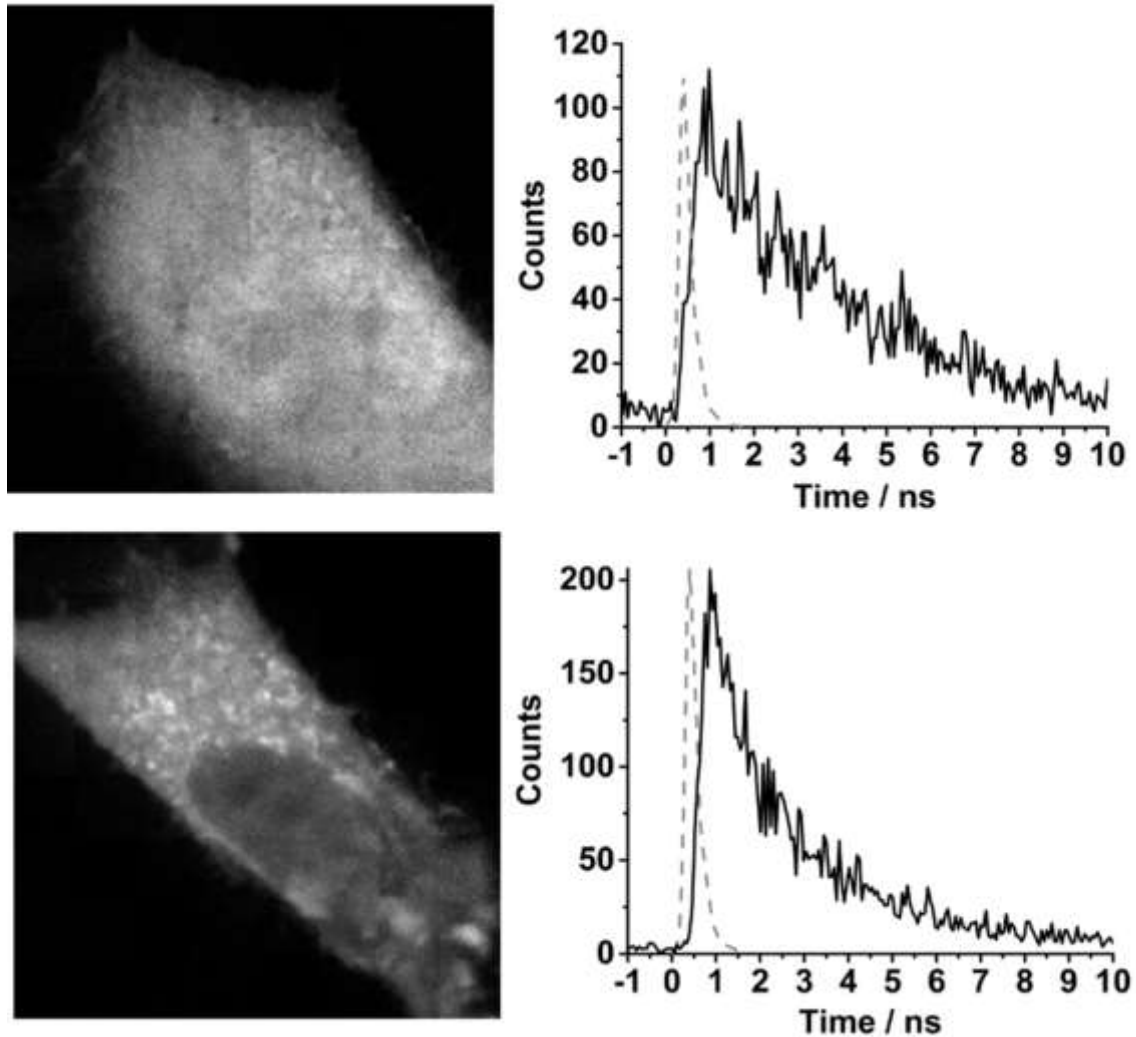

### Supplementary figure 2

Fluorescence intensity and representative fluorescence decays (5x5 pixels) from HeLa cells expressing empty vector mTurq2 (Upper Panel) and mTurq2-Epac1-tdDVenus (lower Panel). Scale bar 5  $\mu\text{m}$ .

## **Supplementary Movie Captions**

**Supplementary movie 1:** FLIM images from a monoexponential fit (5x5 pixel binning) and phasor plots for a HeLa cell expressing empty vector mTurq2 measured for 10 frames (acquisition time 2 s/frame) prior to addition of forskolin (25  $\mu\text{M}$ ) and IBMX (100  $\mu\text{M}$ ). Scale bar 5  $\mu\text{m}$ .

**Supplementary movie 2:** FLIM images from a monoexponential fit (5x5 pixel binning) and phasor plots for a HeLa cell expressing empty vector mTurq2 measured for 45 frames (acquisition time 2 s/frame) following the addition of forskolin (25  $\mu\text{M}$ ) and IBMX (100  $\mu\text{M}$ ). Scale bar 5  $\mu\text{m}$ .

**Supplementary movie 3:** Intensity, phasor plots and images of the fractional contribution,  $f_1$ , of the open “activated” biosensor from tri-exponential fits to the FLIM data (7x7 pixel binning) for a HeLa cell expressing mTurq2-Epac1-tdD Venus measured for 20 frames (acquisition time 2 s/frame) prior to addition of forskolin (25  $\mu\text{M}$ ) and IBMX (100  $\mu\text{M}$ ). Scale bar 5  $\mu\text{m}$ .

**Supplementary movie 4:** Intensity, phasor plots and Images of the fractional contribution,  $f_1$ , of the open “activated” biosensor from tri-exponential fits to the FLIM data (7x7 pixel binning) for a HeLa cell expressing mTurq2-Epac1-tdD Venus measured for 70 frames (acquisition time 2 s/frame) following the addition of forskolin (25  $\mu\text{M}$ ) and IBMX (100  $\mu\text{M}$ ). Scale bar 5  $\mu\text{m}$ .
